# Supplementary material for: Prevalence of Vitiligo Among Adults in the United States
Source: PubMed Central journal article supplement — JAMA Dermatol. 2021 Nov 17;158(1):1–9. doi: 10.1001/jamadermatol.2021.4724 (PMC8600454; doi:10.1001/jamadermatol.2021.4724), 2021-11-17
Supplement: jamadermatol-e214724-s001.pdf [file jamadermatol-e214724-s001.pdf]

## Supplemental Online Content

Gandhi K, Ezzedine K, Anastassopoulos KP, et al. Prevalence of vitiligo among adults in the United States. *JAMA Dermatol*. Published online November 17, 2021.  
doi:10.1001/jamadermatol.2021.4724

### **eAppendix.** Vitiligo Screening Questions

This supplemental material has been provided by the authors to give readers additional information about their work.

## A

**1**

Please indicate if you have ever been diagnosed with any of the following conditions and/or the pigmentation of your skin is as described below. Select all that apply.

- Albinism
  - Circular patches of white hair on scalp, eyebrows, eyelashes, or beard area
  - Patchy loss of skin color that is larger than the size of a dime on any part of the body
  - Pityriasis alba or low grade eczema
  - Melasma
  - Tinea versicolor or pityriasis versicolor or fungal infection of the skin or yeast infection of the skin
  - Vitiligo
  - None of the above
- 

**2**

If you have ever been diagnosed with melanoma, was the diagnosis before or after you developed ["vitiligo" or "patchy loss of skin color" based on question #1]?

- Before
  - After
  - Not applicable, I have never been diagnosed with melanoma
- 

**3**

If your patchy loss of skin color is related to a burn due to any cause (e.g., chemical, fire), did your patchy loss of skin color extend to other areas of the body that were not affected by the burn?

- Yes
  - No
  - Not applicable, patchy loss of skin color is not related to a burn
- 

**4**

Please indicate who made your diagnosis of vitiligo. Select all that apply.

- A dermatologist
  - A doctor who is not a dermatologist [e.g., primary care doctor, pediatrician, family medicine, internal medicine]
  - A nurse practitioner or physician's assistant
  - I made the diagnosis myself
- 

**5**

Does your patchy loss of skin color (even if it is a different amount or location) look similar to any of these pictures? Please scroll down to view all of the pictures.

- Yes
- No

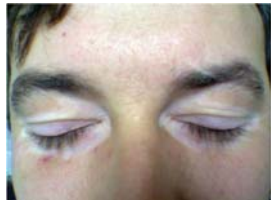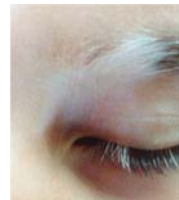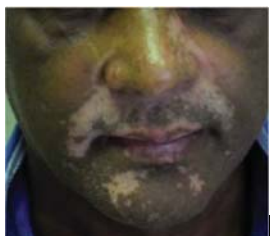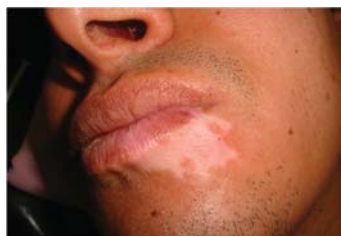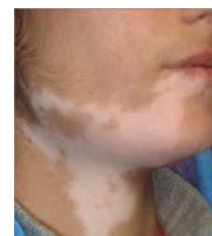

## B

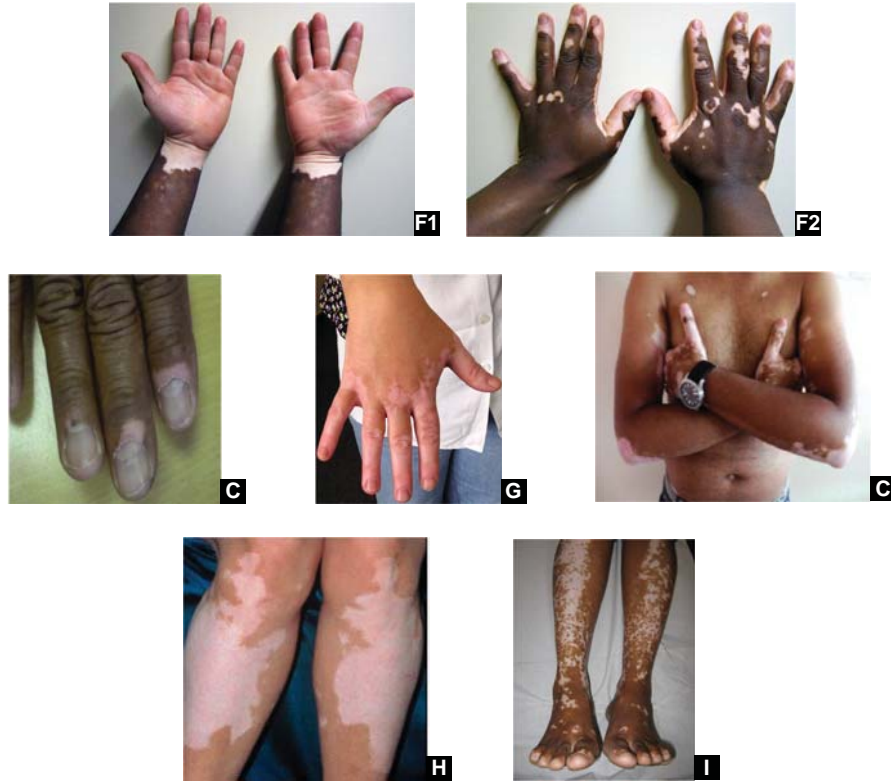

- A: von Nudeldo MS. Eyelid vitiligo [image]. Wikimedia Commons. 2006. Available at: [https://en.wikipedia.org/wiki/File:Eyelid\\_vitiligo\\_06.jpg](https://en.wikipedia.org/wiki/File:Eyelid_vitiligo_06.jpg). Updated July 19, 2017. Accessed 7 December 2020. Licensed under the Creative Commons Attribution Share Alike 4.0 International License
- B: Vitiligo turning hair white [image]. Wikimedia Commons. 2013. Available at: <https://commons.wikimedia.org/wiki/File:Vitiligo.jpeg>. Updated Oct 4, 2020. Accessed 7 December 2020. Licensed under the Creative Commons Attribution Share Alike 3.0 Unported License
- C: Phan C, Ezzedine K, Lai C, et al. Agreement between self reported inflammatory skin disorders and dermatologists' diagnosis: A cross sectional diagnostic study. *Acta dermato venereologica*. 2017;97(10):124 1244. doi:10.2340/00015555 2749. Supplementary material [images] available at: [http://www.medicaljournals.se/acta/content\\_files/additional\\_content/5025FigS1.pdf](http://www.medicaljournals.se/acta/content_files/additional_content/5025FigS1.pdf)
- D: Focal vitiligo [image]. Dermatology Oasis. Published Jan 11, 2014. Available at: [http://dermatologyoasis.net/focal\\_vitiligo/](http://dermatologyoasis.net/focal_vitiligo/). Accessed 7 December 2020. Licensed under the Creative Commons Attribution Share Alike 3.0 Unported License
- E: Neck and chin. [image]. La Verdad. Published June 13, 2018. Available at: [https://laverdadnoticias.com/estiloyvida/Vitiligo\\_Que\\_es\\_y\\_cuales\\_son\\_sintomas\\_y\\_tratamientos\\_20180613\\_0093.html](https://laverdadnoticias.com/estiloyvida/Vitiligo_Que_es_y_cuales_son_sintomas_y_tratamientos_20180613_0093.html). Accessed 7 December 2020. Licensed under the Creative Commons Attribution Share Alike 4.0 International License
- F1: Heilman J. Vitiligo [palm image]. Wikimedia Commons. 2010. Available at: <https://commons.wikimedia.org/wiki/File:Vitiligo1.JPG>. Updated Sept 22, 2020. Accessed 7 December 2020. Licensed under the Creative Commons Attribution Share Alike 4.0 International, 3.0 Unported License
- F2: Heilman J. Vitiligo of the hand in a person with dark skin [image]. Wikimedia Commons. 2010. Available at: <https://commons.wikimedia.org/wiki/File:Vitiligo2.JPG>. Updated Oct 18, 2020. Accessed 7 December 2020. Licensed under the Creative Commons Attribution Share Alike 4.0 International, 3.0 Unported License
- G: Vitiligo Image. [image]. Wikimedia Commons. 2005. Available at: <https://commons.wikimedia.org/wiki/File:Vitiligo03.jpg>. Updated 31 March 2015. Accessed 7 December 2020. Licensed under the Creative Commons Attribution Share Alike 3.0 Unported License
- H. TCS script concordance testing [image]. Wikimedia Commons. 2012. Available from [https://commons.wikimedia.org/wiki/File:TCS\\_script\\_concordance\\_testing.jpg](https://commons.wikimedia.org/wiki/File:TCS_script_concordance_testing.jpg) through the Creative Commons Attribution-Share Alike 3.0 Unported license.
- I: Da Oger G. Vitiligo [image]. Wikimedia Commons. 2009. Available from <https://commons.wikimedia.org/wiki/File:Vitiligo.jpg> through the Creative Commons Attribution-Share Alike 4.0 International, 3.0 Unported, 2.5 Generic, 2.0 Generic and 1.0 Generic license

The screening questions were adapted from published tools for screening patients diagnosed with vitiligo.<sup>16,17</sup> The sources of the vitiligo images used in the survey were listed underneath the images and visible to the study participants as shown in the figure. Images labeled as 'C' were previously published in *Acta Dermato-Venereologica* for the Society for Publication of *Acta Dermato-Venereologica*.
